# Supplementary material
Source: PubMed Central journal article supplement (PMC5325675)
Supplement: NIHMS844918-supplement.pdf [file NIHMS844918-supplement.pdf]

Figure S1

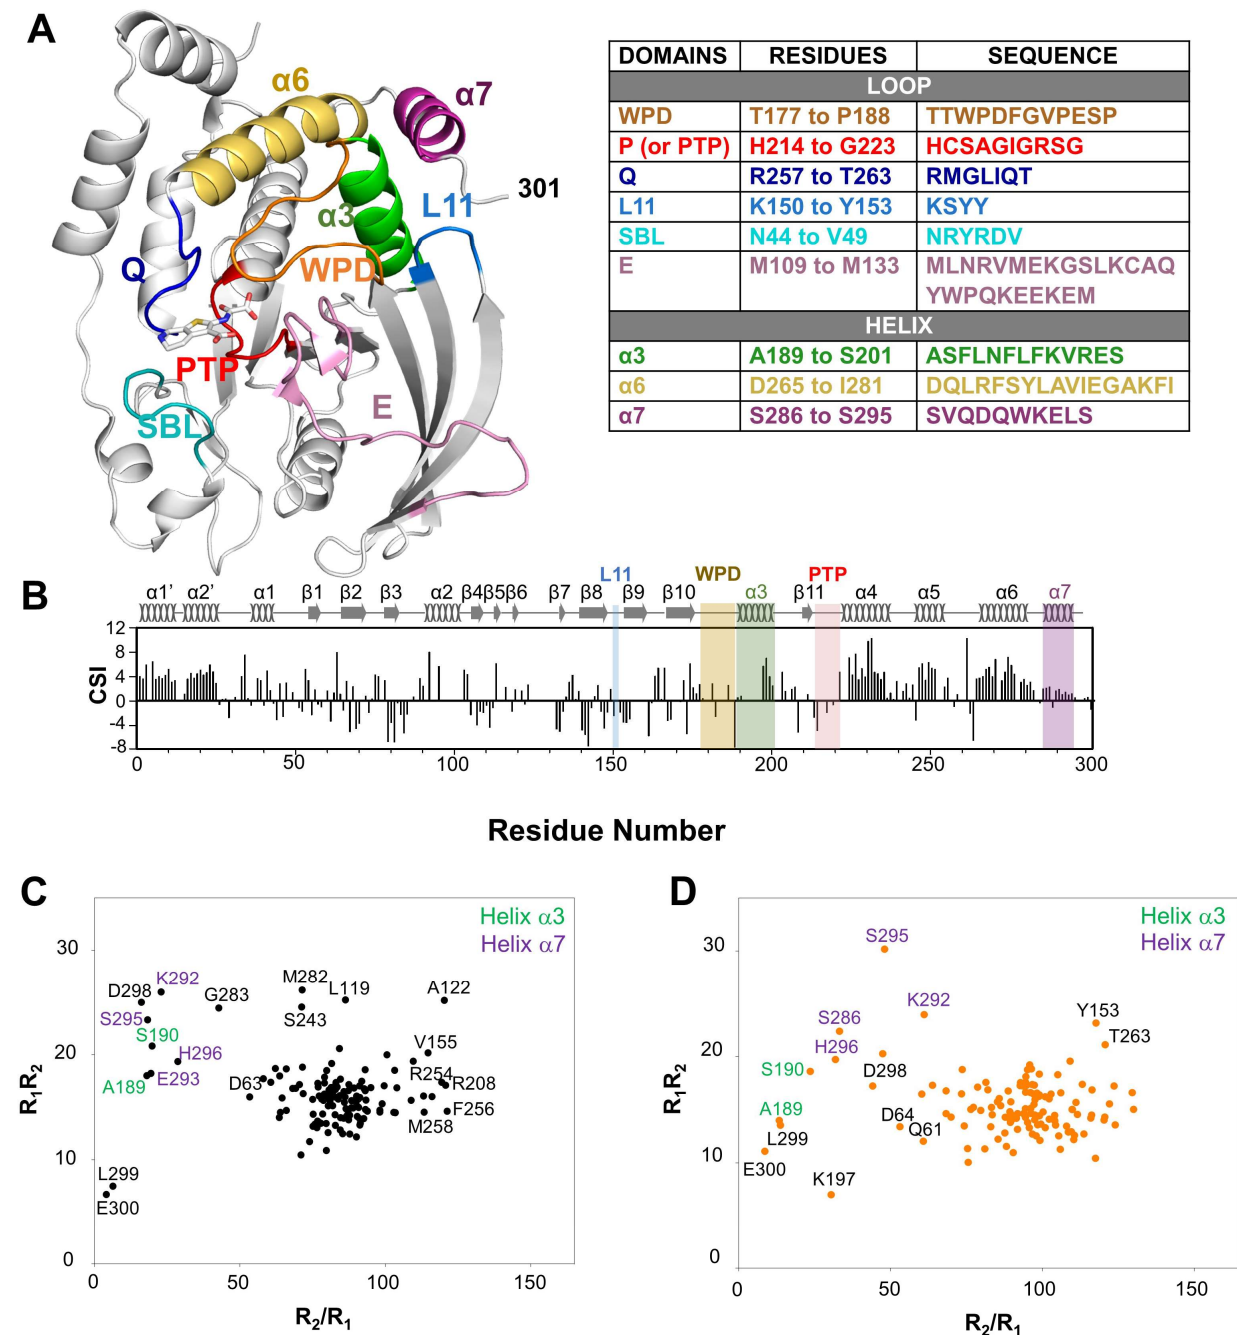

**Figure S1. PTP1B, related to Figure 1.**

**(A)** Domains of PTP1B, with key PTP1B structural elements color coded and described as indicated. The TCS401 inhibitor is shown in sticks (PDB: 5K9W).

**(B)** Chemical shift index (CSI) analysis of PTP1B<sub>1-301</sub> (the catalytic domain). The protein secondary structures are identified using program CSI 2.0 based on backbone chemical shift of <sup>13</sup>C<sub>α</sub> and <sup>13</sup>C<sub>β</sub> and PTP1B sequence. L11 (blue), WPD (brown),  $\alpha$ 3 (green), PTP (red) and  $\alpha$ 7 (purple) residues are highlighted.

**(C)** Bracken plot of backbone <sup>15</sup>N relaxation data for PTP1B.

**(D)** Bracken plot of backbone <sup>15</sup>N relaxation data for PTP1B:TCS401.

Figure S2

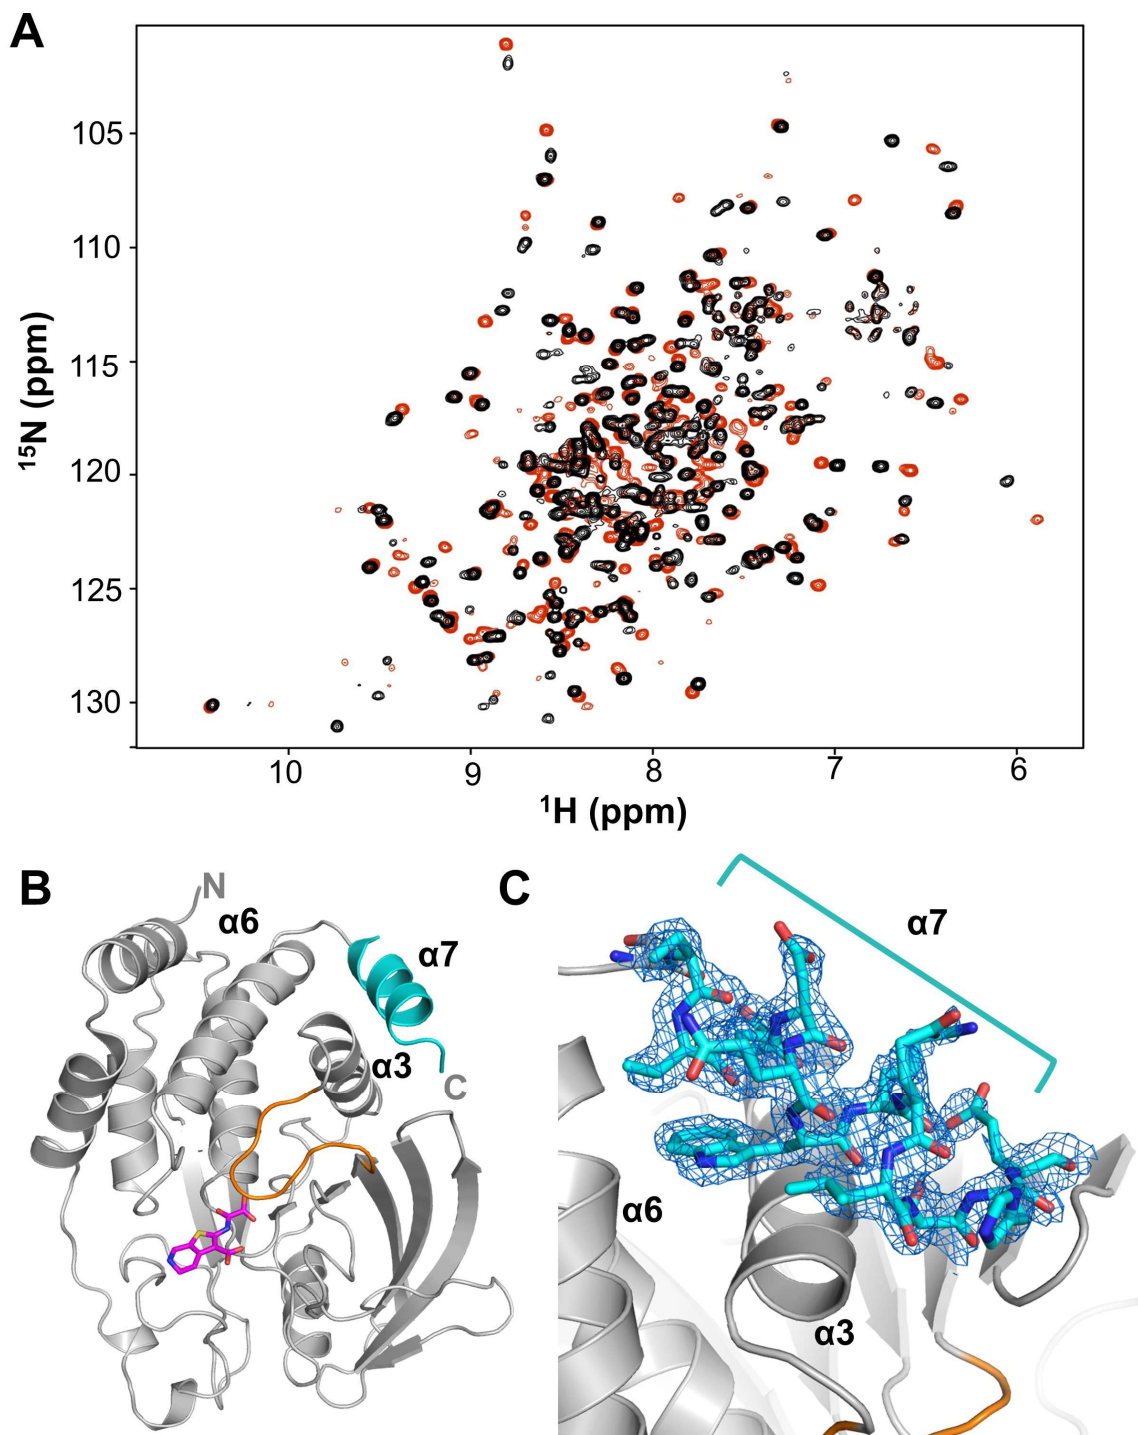

**Figure S2. PTP1B helix  $\alpha 7$  becomes ordered upon binding TCS401, related to Figure 1.**

**(A)** Overlay of the 2D [ $^1\text{H}$ - $^{15}\text{N}$ ] TROSY spectra of PTP1B (black) and PTP1B:TCS401 (1:3 molar ratio, red). Spectra were recorded at 298 K at a proton resonance frequency of 850 MHz.

**(B)** Crystal structure of the PTP1B:TCS401 complex (PDB: 5K9W). TCS401 is shown as sticks (pink), the closed PTP loop in orange and the ordered C-terminal helix  $\alpha 7$  (cyan).

**(C)** Electron density map (2Fo-Fc,  $\sigma=1.0$ ) of PTP1B helix  $\alpha 7$  (cyan; residues 286-295, bracket).

Figure S3

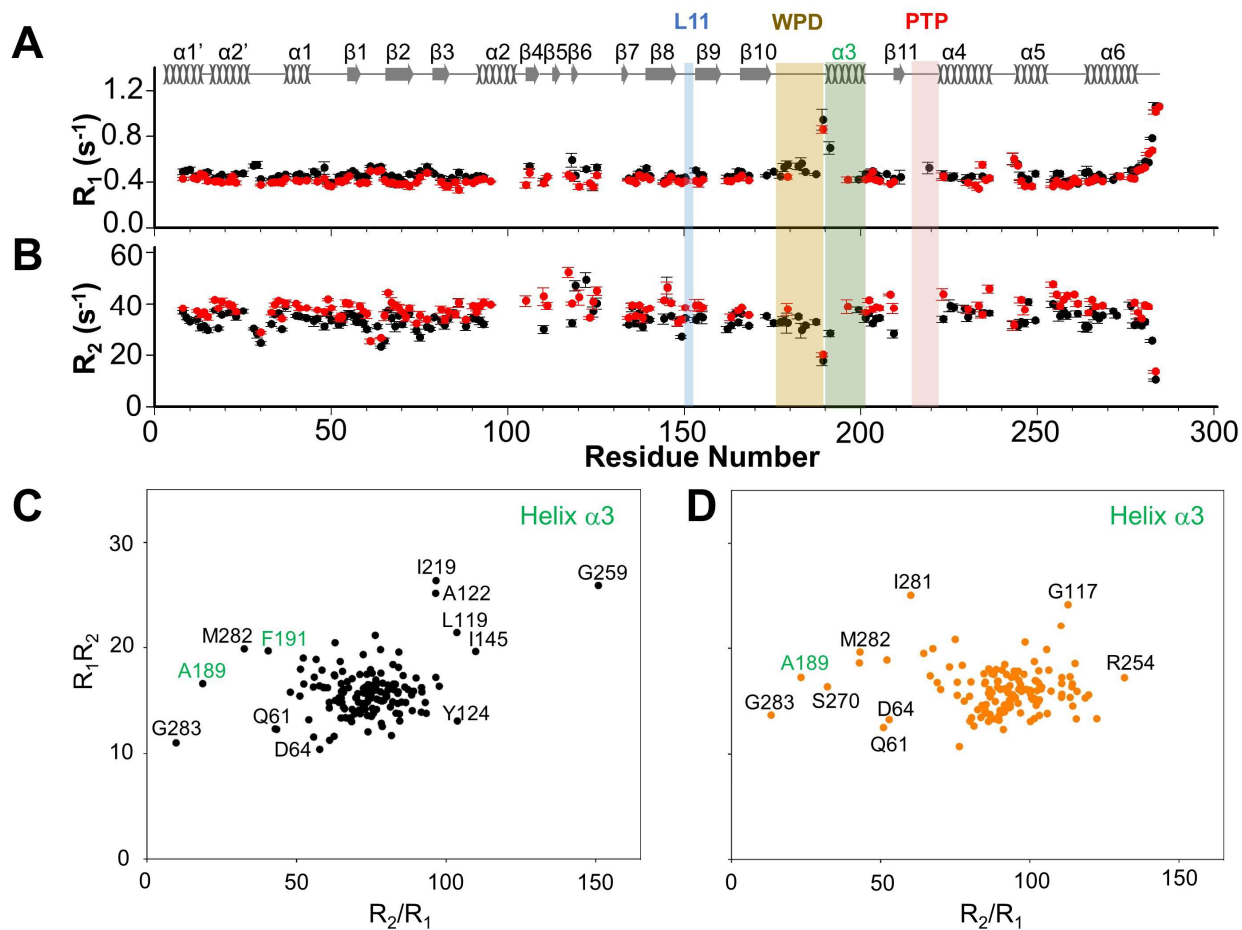

**Figure S3. Relaxation data for PTP1B $\Delta$ 7 (residues 1-284); related to Figure 2.**

- (A)  $^{15}\text{N}$  longitudinal  $R_1$  relaxation rates for PTP1B $\Delta$ 7 (black) and PTP1B $\Delta$ 7:TCS401 (red).  
(B) Transverse  $R_2$  relaxation rates for PTP1B $\Delta$ 7 (black) and PTP1B $\Delta$ 7:TCS401 (red). L11 (blue), WPD (brown),  $\alpha_3$  (green) and PTP (red) residues are highlighted.  
(C) Bracken plot of backbone  $^{15}\text{N}$  relaxation data for PTP1B $\Delta$ 7.  
(D) Bracken plot of backbone  $^{15}\text{N}$  relaxation data for PTP1B $\Delta$ 7:TCS401.

**Figure S4**

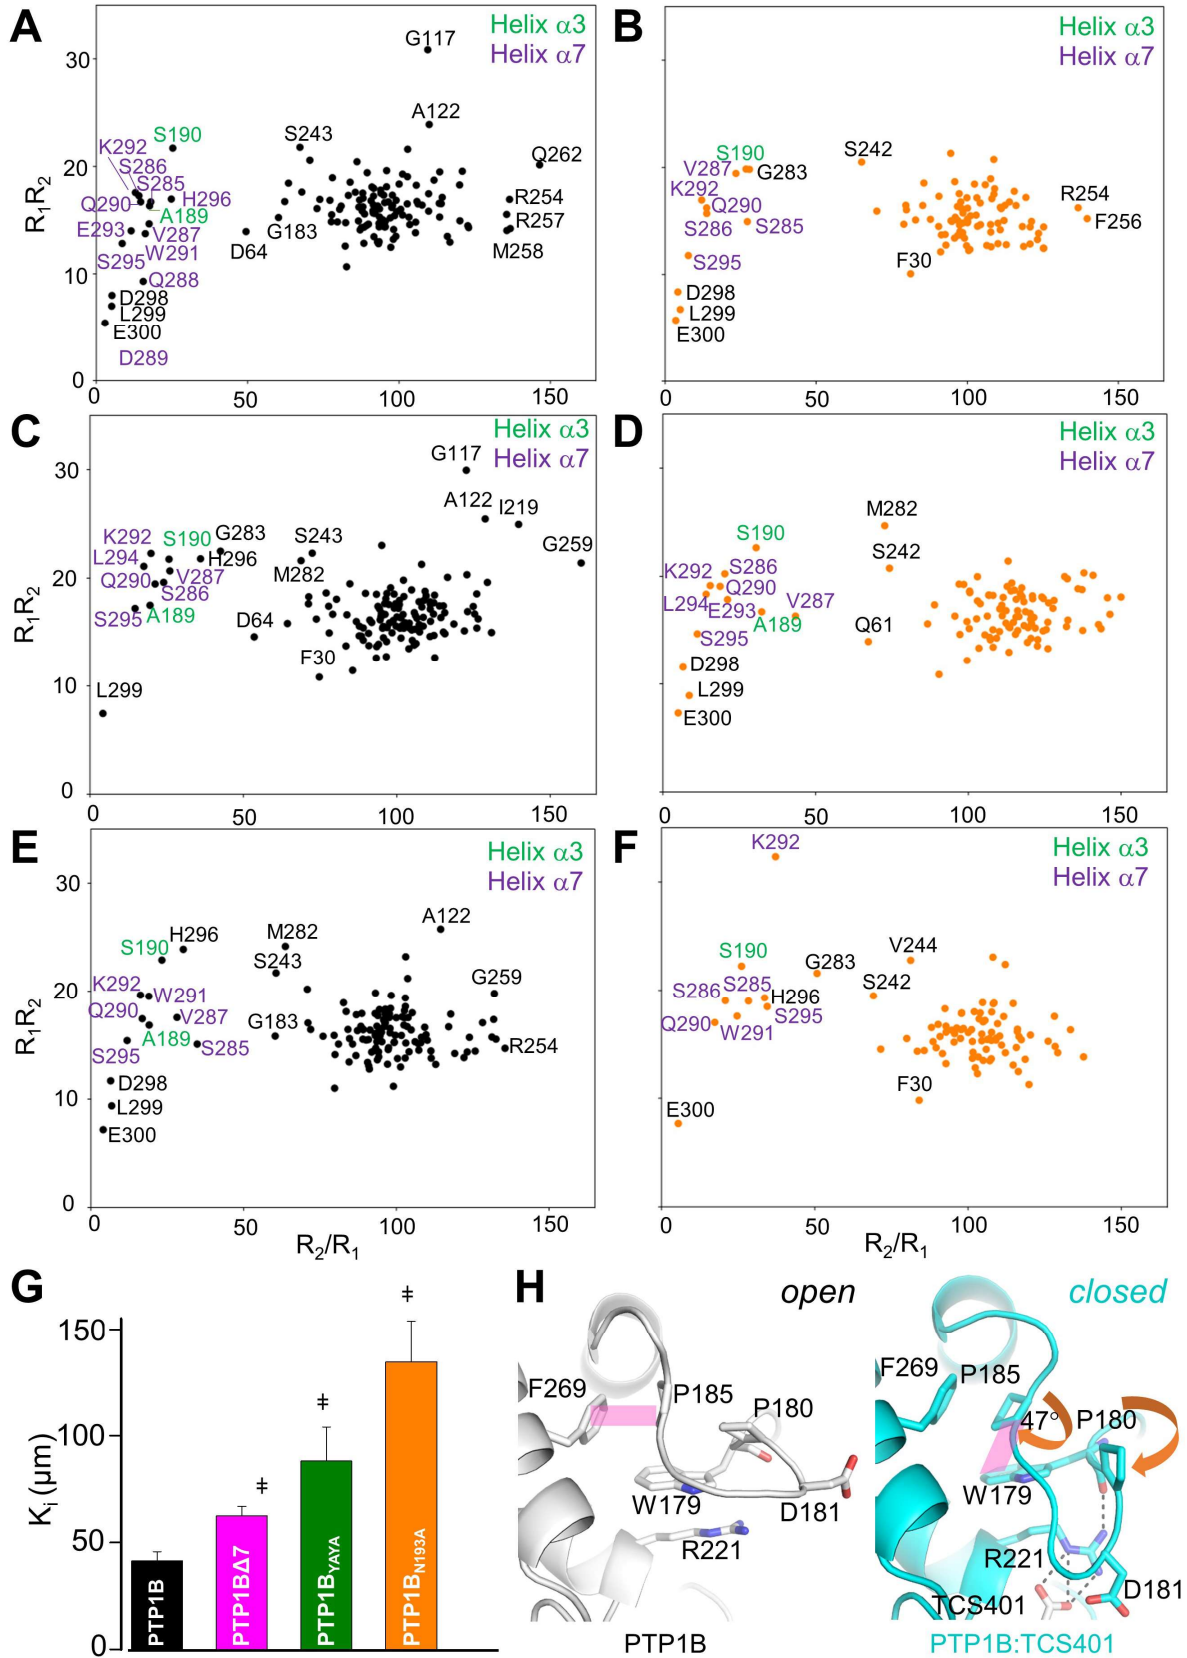

**Figure S4. Relaxation and activity data for PTP1B allosteric variants, related to Figure 3.**

- (A) Bracken plot of backbone  $^{15}\text{N}$  relaxation data for PTP1B<sub>YAYA</sub>.
- (B) Bracken plot of backbone  $^{15}\text{N}$  relaxation data for PTP1B<sub>YAYA</sub>:TCS401.
- (C) Bracken plot of backbone  $^{15}\text{N}$  relaxation data for PTP1B<sub>N193A</sub>.
- (D) Bracken plot of backbone  $^{15}\text{N}$  relaxation data for PTP1B<sub>N193A</sub>:TCS401.
- (E) Bracken plot of backbone  $^{15}\text{N}$  relaxation data for PTP1B<sub>T178A</sub>.
- (F) Bracken plot of backbone  $^{15}\text{N}$  relaxation data for PTP1B<sub>T178A</sub>:TCS401.
- (G)  $K_i$  values of PTP1B and mutants by TCS401 ( $\pm$ SE,  $n=3-9$ , #t-test,  $p < 0.05$ ).
- (H) Role of P185 in WPD loop closure. P180 is perpendicular to P185 in PTP1B open state (gray, PDB: 5K9V). In the closed state (cyan, PDB: 5K9W), P180 rotates  $\sim 90^\circ$  due to the formation of hydrogen bond between backbone of W179 and side chain of R211, facilitating the closure of WPD loop. CH/ $\pi$  stacking between P185, F269 and W179 is shaded in pink.

Figure S5

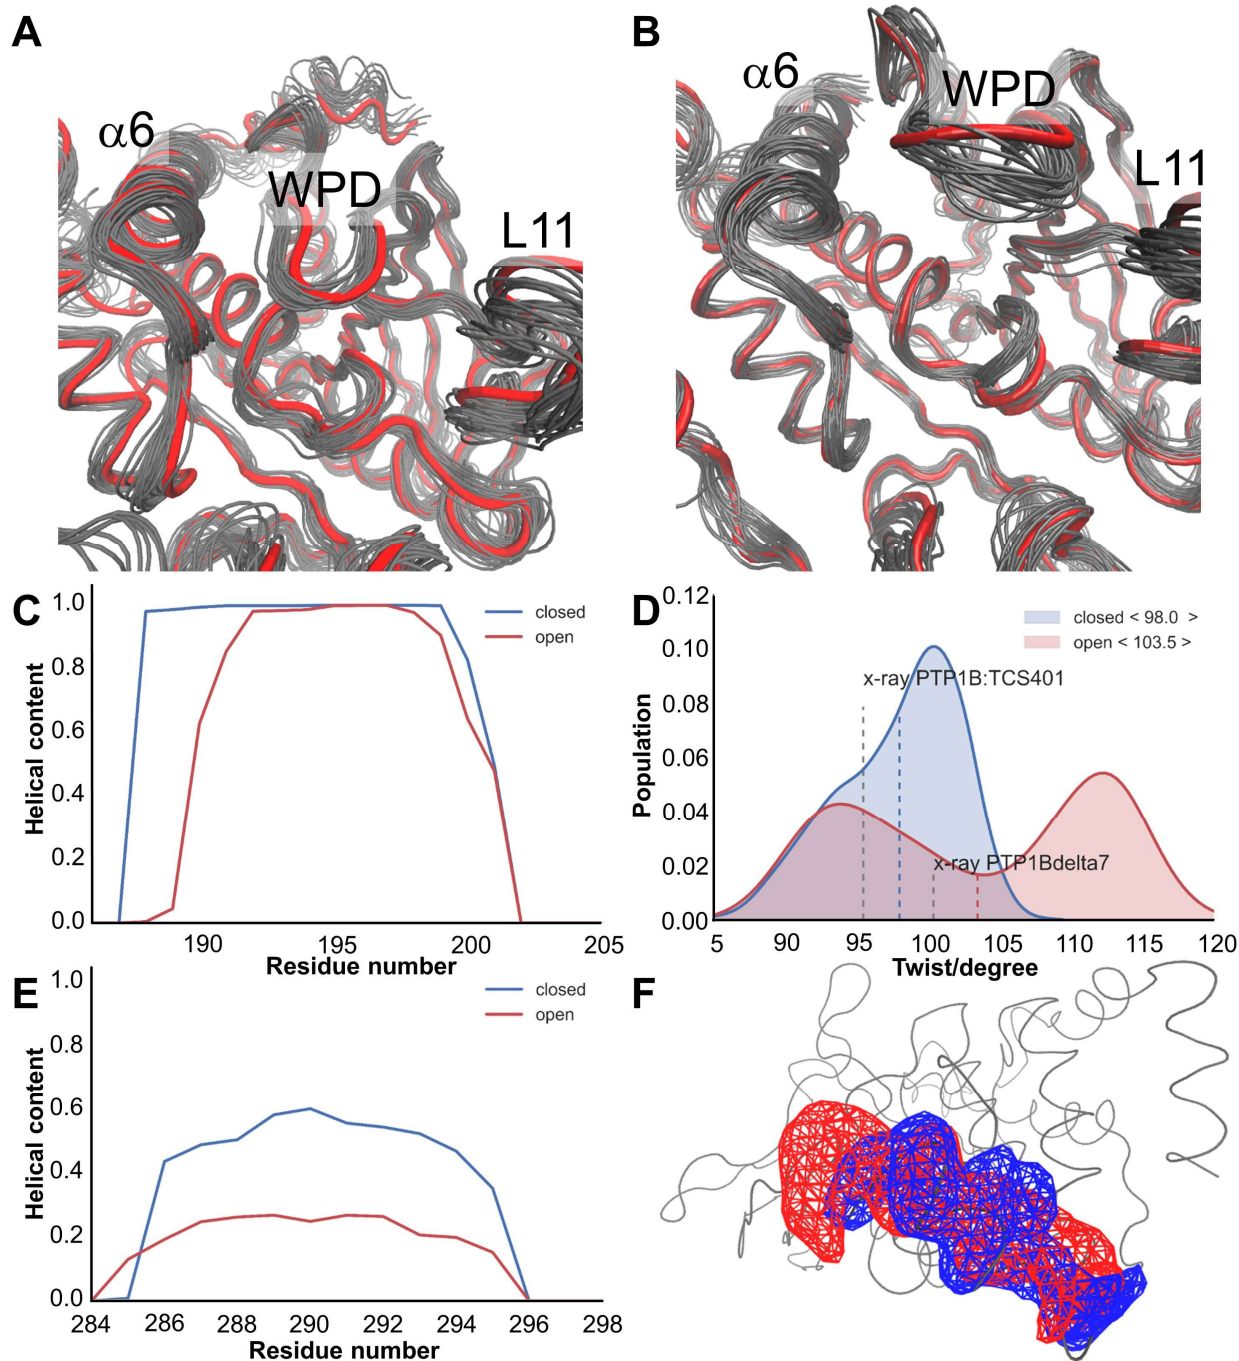

**Figure S5. PTP1B chemical shift restrained molecular dynamics, related to Figure 5.**

**(A)** Superposition of 32 structures from the unbiased MD (gray tubes) using PTP1B:TCS401 (PDB: 5K9W) as starting structure (red tube). The WPD stays closed.

**(B)** Superposition of 32 structures from the unbiased MD (gray tubes) using PTP1B $\Delta$ 7 (PDB: 5KA0) as starting structure (red tube).

**(C)** Helix  $\alpha 3$  shortens/twists when the WPD loop opens. Helical content of  $\alpha 3$  in the open (red) and closed (blue) state, showing that 2 residues on the N-terminus of the helix unfold (melt) in the open state of the WPD loop.

**(D)** Unit-twist of an N-terminal turn of  $\alpha 3$  (residues 190-193) showing the twisting of the N-terminus of  $\alpha 3$ .

**(E)** Helix  $\alpha 7$  appears less well-ordered in the open state. Helical content of  $\alpha 7$  in the open (red) and closed (blue) state, showing that  $\alpha 7$  melts in the open state of the WPD loop.

**(F)** Overall structure of  $\alpha 7$  represented by the occupancy averaged over open (red) and closed (blue) trajectory frames. It can be seen that in the closed form the overall helical shape is contained on average, whereas in the open state  $\alpha 7$  is more extended and less ordered.

**Table S1.** Inhibitor  $K_D$ , turnover rates ( $k_{cat}$ ) and catalytic efficiencies ( $k_{cat}/K_m$ ) of PTP1B and its variants; *related to Figure 1.*

| PTP1B variant                     | TCS401 $K_D$ ( $\mu\text{M}$ ) | Allosteric Inhibitor $K_D$ ( $\mu\text{M}$ ) | $k_{cat}$ ( $\text{s}^{-1}$ ) | $k_{cat}/K_m$ ( $\times 10^3 \text{ M}^{-1}\text{s}^{-1}$ ) |
|-----------------------------------|--------------------------------|----------------------------------------------|-------------------------------|-------------------------------------------------------------|
| PTP1B                             | 26 $\pm$ 1.8                   | 7.8 $\pm$ 0.8                                | 4.4 $\pm$ 0.4                 | 5.0 $\pm$ 0.8                                               |
| PTP1B $\Delta$ 7                  | 33 $\pm$ 5.6                   | 21 $\pm$ 1.6*                                | 2.8 $\pm$ 0.3                 | 2.1 $\pm$ 0.1*                                              |
| PTP1B <sub>L192A</sub>            | 39 $\pm$ 6                     | 22 $\pm$ 0.8*                                | 0.5 $\pm$ 0.03*               | 0.46 $\pm$ 0.04*                                            |
| PTP1B <sub>N193A</sub>            | 37 $\pm$ 4                     | 13 $\pm$ 0.6*#                               | 2.5 $\pm$ 0.2*                | 1.8 $\pm$ 0.3*                                              |
| PTP1B <sub>YAYA</sub>             | 26 $\pm$ 3                     | 12 $\pm$ 0.7*#                               | 3.1 $\pm$ 0.1*                | 2.3 $\pm$ 0.1*                                              |
| PTP1B <sub>Y152F</sub>            | n.d.                           | n.d.                                         | 3.2 $\pm$ 0.09*               | 3.4 $\pm$ 0.06*                                             |
| PTP1B <sub>Y153F</sub>            | n.d.                           | n.d.                                         | 3.3 $\pm$ 0.03*               | 3.7 $\pm$ 0.5*                                              |
| PTP1B <sub>Y152A</sub>            | n.d.                           | n.d.                                         | 2.9 $\pm$ 0.1*                | 3.1 $\pm$ 0.08*                                             |
| PTP1B <sub>Y153A</sub>            | n.d.                           | n.d.                                         | 3.6 $\pm$ 0.04*               | 3.9 $\pm$ 0.4*                                              |
| PTP1B <sub>T178A</sub>            | 45 $\pm$ 3.5*                  | n.d.                                         | 2.5 $\pm$ 0.03*               | 1.7 $\pm$ 0.1*                                              |
| PTP1B <sub>P185G</sub>            | 20 $\pm$ 0.6*                  | n.d.                                         | 0.08 $\pm$ 0.002*             | 0.1 $\pm$ 0.03*                                             |
| PTP1B $\Delta$ 7 <sub>P185G</sub> | 21 $\pm$ 3.6                   | n.d.                                         | 0.09 $\pm$ 0.002*#            | 0.1 $\pm$ 0.05*#                                            |
| PTP1B <sub>V184G</sub>            | 31 $\pm$ 1.8                   | n.d.                                         | 0.4 $\pm$ 0.02*               | 0.5 $\pm$ 0.05*                                             |
| PTP1B $\Delta$ 7 <sub>V184G</sub> | 35 $\pm$ 2.7                   | n.d.                                         | 0.6 $\pm$ 0.02*#              | 0.4 $\pm$ 0.02*#                                            |
| PTP1B <sub>Y176G</sub>            | 34 $\pm$ 4                     | n.d.                                         | 1.4 $\pm$ 0.04*               | 1.4 $\pm$ 0.07*                                             |
| PTP1B <sub>T177G</sub>            | 34 $\pm$ 5.4                   | n.d.                                         | 6.0 $\pm$ 0.002               | 23.0 $\pm$ 0.7*                                             |
| PTP1B $\Delta$ 7 <sub>T177G</sub> | n.d.                           | n.d.                                         | 6.0 $\pm$ 0.002#              | 19 $\pm$ 0.8*#                                              |

\*statistically significant difference between PTP1B and variants, t-test,  $p < 0.05$

#statistically significant difference between PTP1B $\Delta$ 7 and variants, t-test,  $p < 0.05$

n.d. not determined



**Table S2.** Melting temperatures ( $T_M$ ) of PTP1B and variants, *related to Figure 1.*

| <b>PTP1B variant</b>              | <b><math>T_M</math> (°C)</b> |
|-----------------------------------|------------------------------|
| PTP1B                             | 54.7                         |
| PTP1B $\Delta$ 7                  | 53.5                         |
| PTP1B <sub>L192A</sub>            | 51.3                         |
| PTP1B <sub>N193A</sub>            | 49.0                         |
| PTP1B <sub>YAY</sub> A            | 50.4                         |
| PTP1B <sub>T178A</sub>            | 60.0                         |
| PTP1B <sub>P185G</sub>            | 47.3                         |
| PTP1B $\Delta$ 7 <sub>P185G</sub> | 45.3                         |
| PTP1B <sub>V184G</sub>            | 47.4                         |
| PTP1B $\Delta$ 7 <sub>V184G</sub> | 45.7                         |
| PTP1B <sub>Y176G</sub>            | 40.7                         |
| PTP1B $\Delta$ 7 <sub>T177G</sub> | 47.3                         |

**Table S3.** Catalytic efficiency and inhibition constants of PTP1B and variant activity by TCS-401, related to Figure 1.

| <b>PTP1B variant</b>   | <b><math>k_{cat}/K_m</math><br/>(<math>\times 10^3 M^{-1}s^{-1}</math>)</b> | <b><math>k_{cat}/K_m</math><br/>(<math>\times 10^3 M^{-1}s^{-1}</math>)<br/>TCS401 100 <math>\mu M</math></b> | <b><math>k_{cat}/K_m</math><br/>(<math>\times 10^3 M^{-1}s^{-1}</math>)<br/>TCS401 300 <math>\mu M</math></b> | <b><math>K_i</math><br/>(<math>\mu M</math>)</b> |
|------------------------|-----------------------------------------------------------------------------|---------------------------------------------------------------------------------------------------------------|---------------------------------------------------------------------------------------------------------------|--------------------------------------------------|
| PTP1B                  | 5.0 $\pm$ 0.8                                                               | 1.1 $\pm$ 0.08‡                                                                                               | 0.5 $\pm$ 0.04‡                                                                                               | 41 $\pm$ 4.4                                     |
| PTP1B $\Delta$ 7       | 2.1 $\pm$ 0.1*                                                              | 0.7 $\pm$ 0.07*                                                                                               | 0.3 $\pm$ 0.03*                                                                                               | 63 $\pm$ 4.4*                                    |
| PTP1B <sub>N193A</sub> | 1.8 $\pm$ 0.3*                                                              | 0.9 $\pm$ 0.08‡                                                                                               | 0.5 $\pm$ 0.04‡                                                                                               | 135 $\pm$ 19*                                    |
| PTP1B <sub>YAYA</sub>  | 2.3 $\pm$ 0.1*                                                              | 1.0 $\pm$ 0.07*                                                                                               | 0.6 $\pm$ 0.02‡                                                                                               | 88 $\pm$ 16*                                     |

\*statistically significant difference between PTP1B and variants, t-test,  $p < 0.05$

‡statistically significant difference between Cr and TCS, paired t-test,  $p < 0.05$

**Table S4.** Key allosteric residues in PTP1B, *related to Figure 6.*

| <b>Key allosteric residues in PTP1B</b> | <b>Number of PTPs with allosteric residue conserved</b> | <b>% conservation in PTP family*</b> | <b>Identity of the residues present in PTPs for which the allosteric residue is not conserved<sup>o</sup></b> | <b>Conservation in PTP1B &amp; TCPTP (%)</b> |
|-----------------------------------------|---------------------------------------------------------|--------------------------------------|---------------------------------------------------------------------------------------------------------------|----------------------------------------------|
| <b>Y152</b>                             | 4                                                       | 11                                   | D(12), E(8), T(4), C(3), A(2), N(2), G(1), H(1)                                                               | 100                                          |
| <b>Y153</b>                             | 25                                                      | 68                                   | F(5), W(5), H(1), I(1)                                                                                        | 100                                          |
| <b>T178</b>                             | 4                                                       | 11                                   | S(12), A(11), D(2), G(2), N(2), Q(2), K(1), V(1)                                                              | 100                                          |
| <b>P185</b>                             | 37                                                      | 100                                  |                                                                                                               | 100                                          |
| <b>S187</b>                             | 13                                                      | 35                                   | D(6), Y(5), H(4), T(4), A(1), E(1), N(1), Q(1), R(1)                                                          | 100                                          |
| <b>S190</b>                             | 8                                                       | 22                                   | P(11), G(10), D(3), L(2), H(1), I(1), N(1)                                                                    | 100                                          |
| <b>F191</b>                             | 9                                                       | 24                                   | L(15), I(4), V(4), M (3), A(1), N(1)                                                                          | 100                                          |
| <b>L192</b>                             | 31                                                      | 84                                   | I(4), F(2)                                                                                                    | 100                                          |
| <b>N193</b>                             | 2                                                       | 5                                    | D(6), A(5), K(4), S(4), R(3), Q(3), T(3), E(2), G(2), H(2), W(1)                                              | 100                                          |
| <b>F269</b>                             | 33                                                      | 89                                   | L(3), Y(1)                                                                                                    | 100                                          |

\*Total number of the classic PTPs of human=37.

<sup>o</sup>Numbers in parentheses indicate the number of PTPs with that residue.
